# Supplementary material
Source: PubMed Central journal article supplement (PMC7108161)

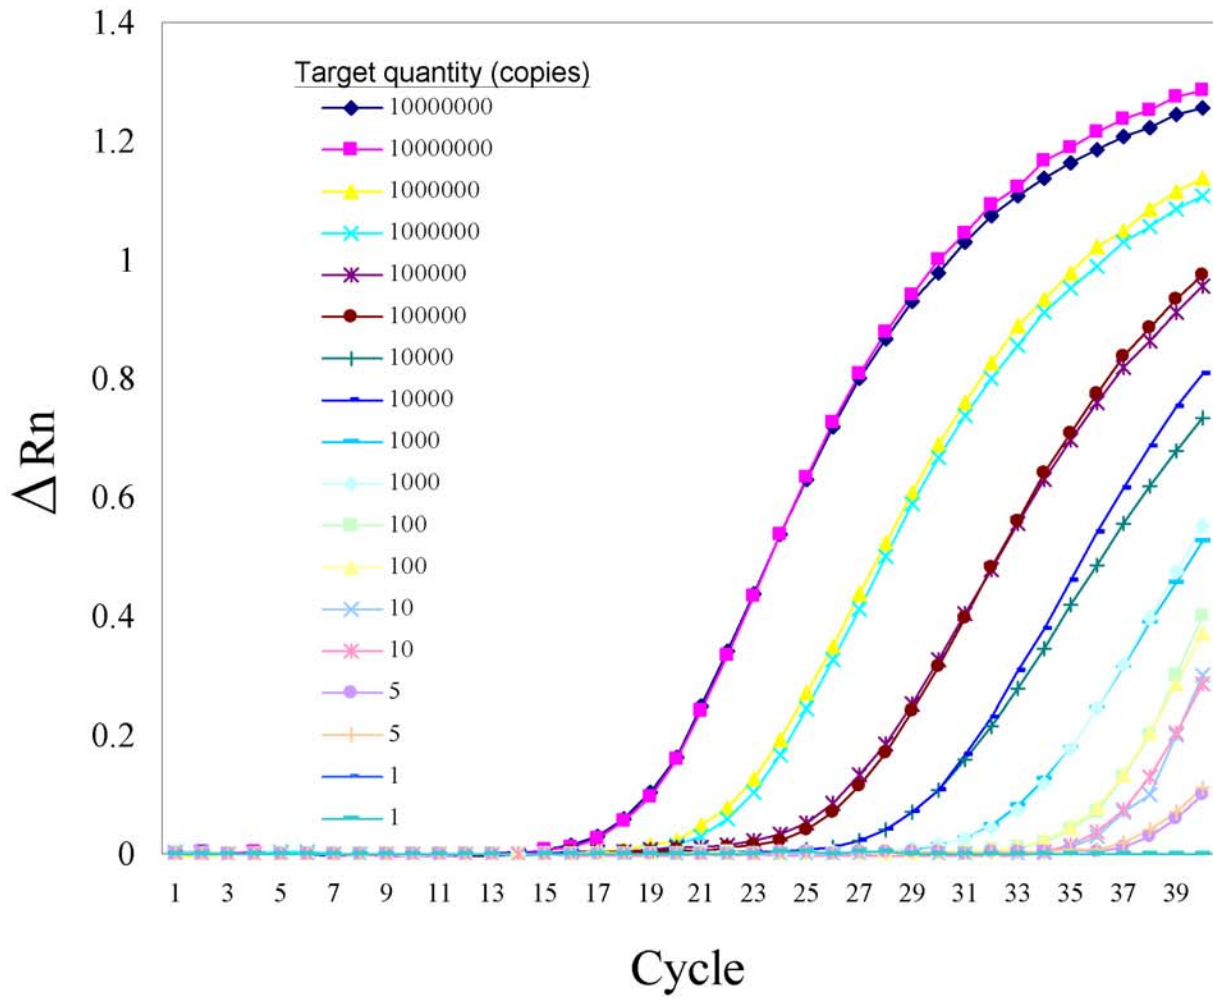

Supplement: figure1.pdf [file figure1.pdf]

Figure 2

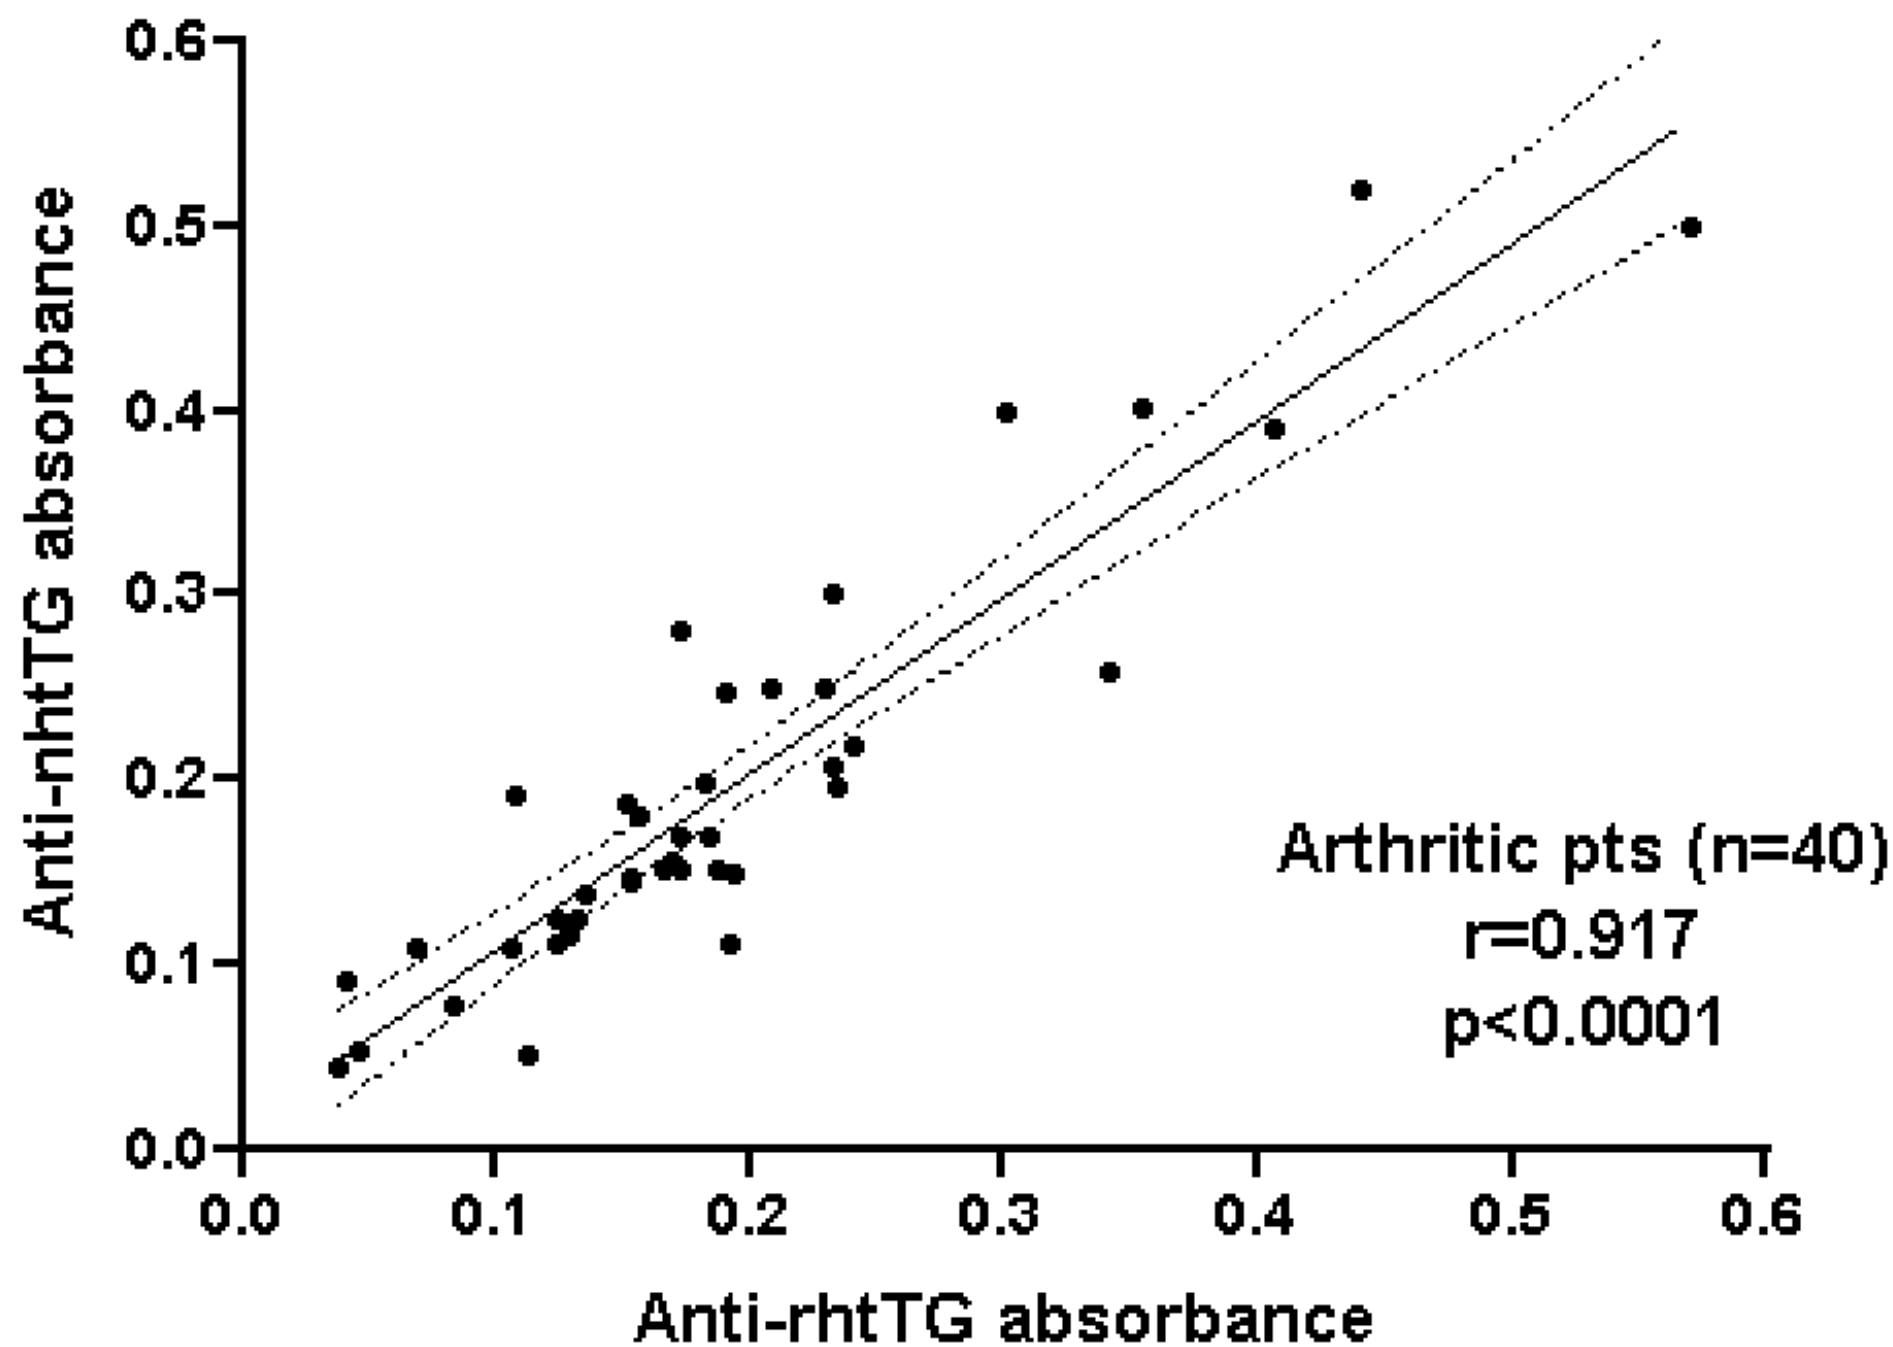

Supplement: figure2.pdf [file figure2.pdf]

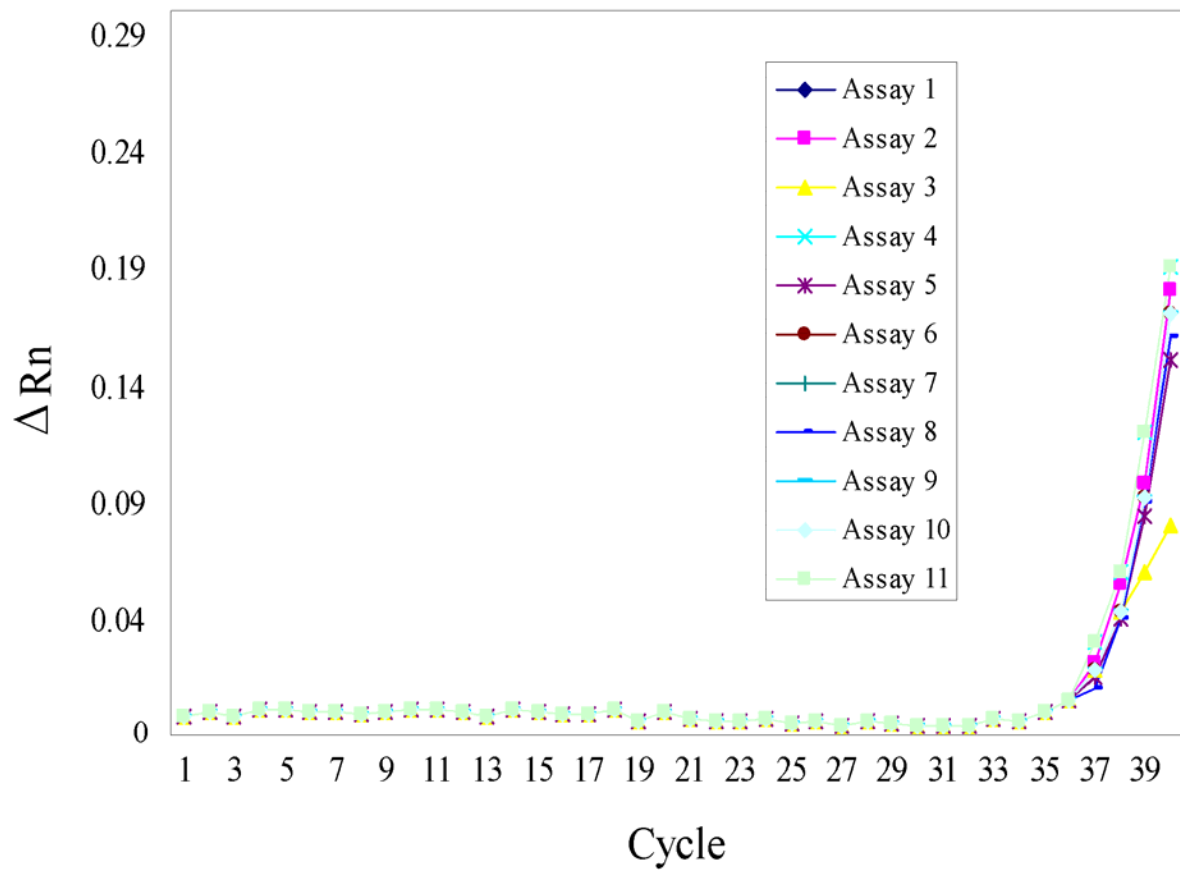

Supplement: figure3.pdf [file figure3.pdf]

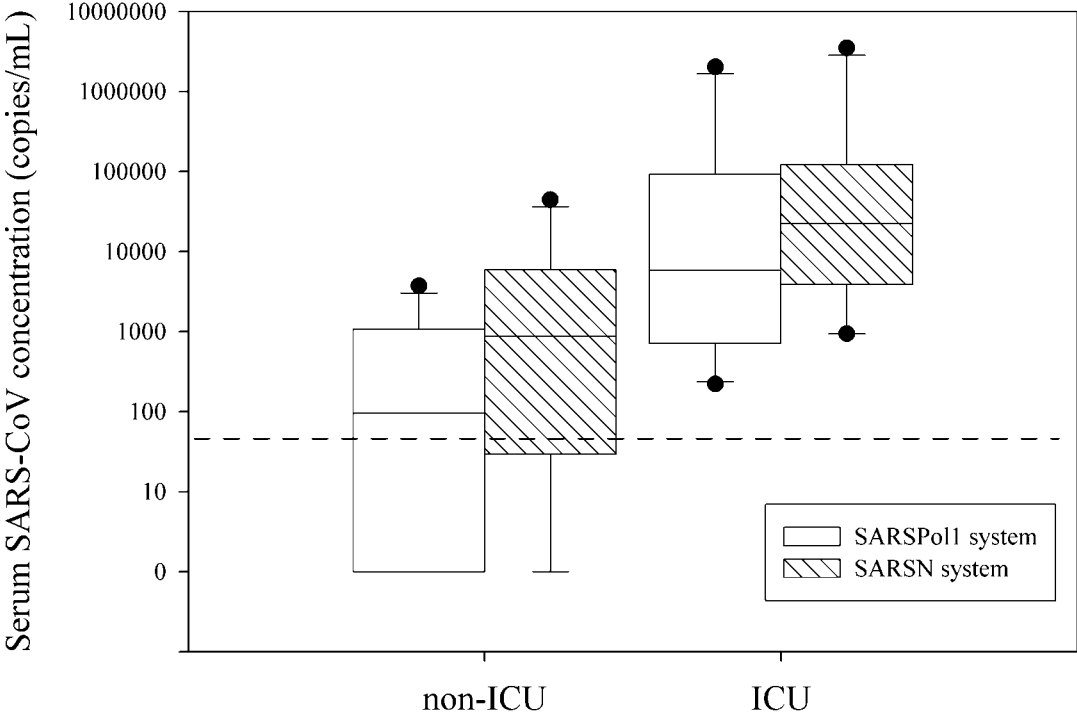

Supplement: figure4.pdf [file figure4.pdf]
